# Supplementary material for: Defoliation Change of European Beech (Fagus sylvatica L.) Depends on Previous Year Drought
Source: MDPI journal article supplement (doi:10.3390/plants11060730), 2022-03-09
Supplement: s1 [file s1]

## Supplement material

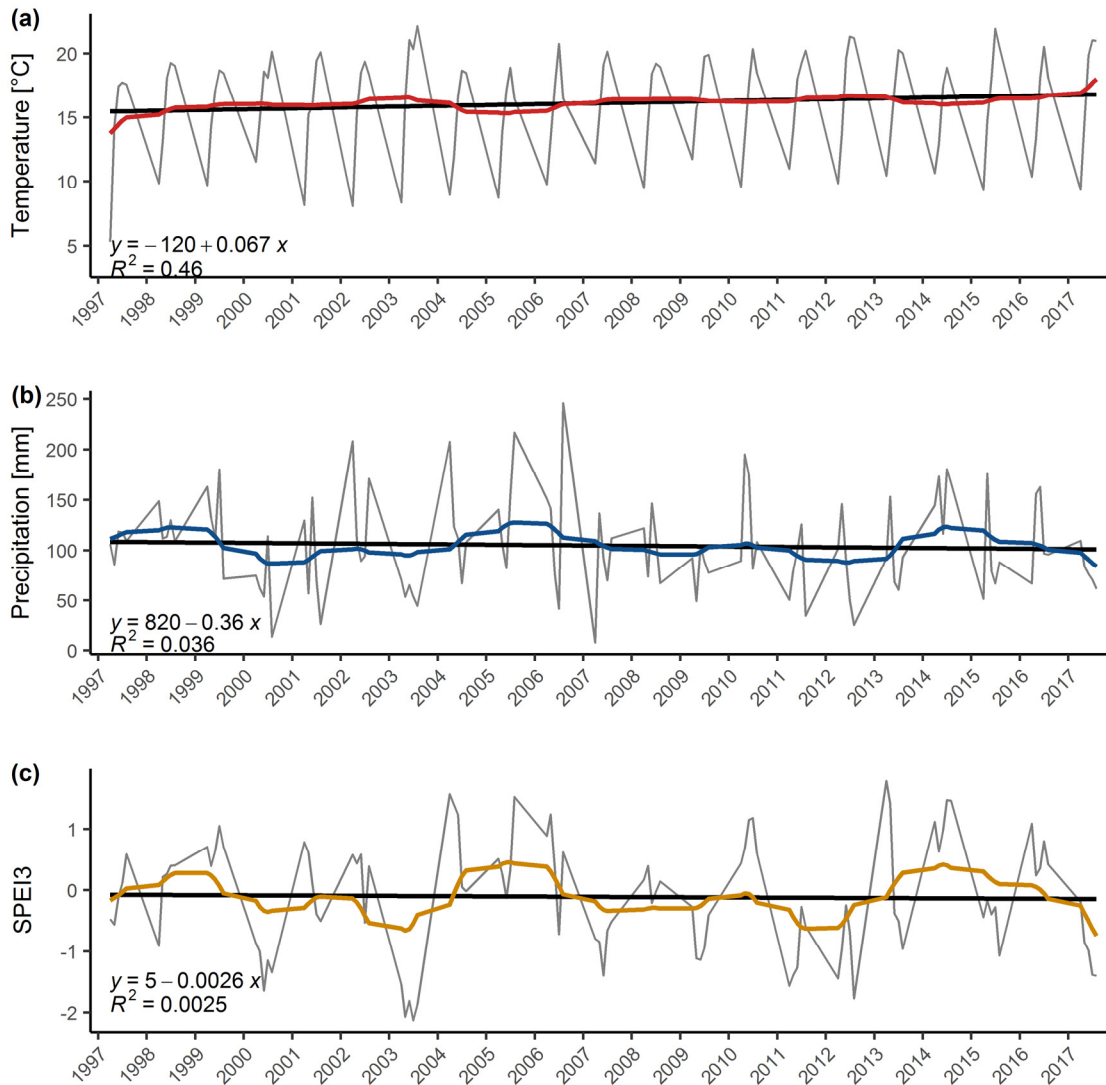

**Figure S1.** Linear regression fits (black lines) and kernel smoothing functions (color lines) for one-year smoothed mean monthly temperature, monthly precipitation sum and mean monthly SPEI data (grey lines) on the research plots during the vegetation period. Time series analyses [1] indicated that the temporal increase of temperature for 1997-2017 was statistically significant ( $p < 0.001$ ), while there was no significant trend for precipitation and SPEI.

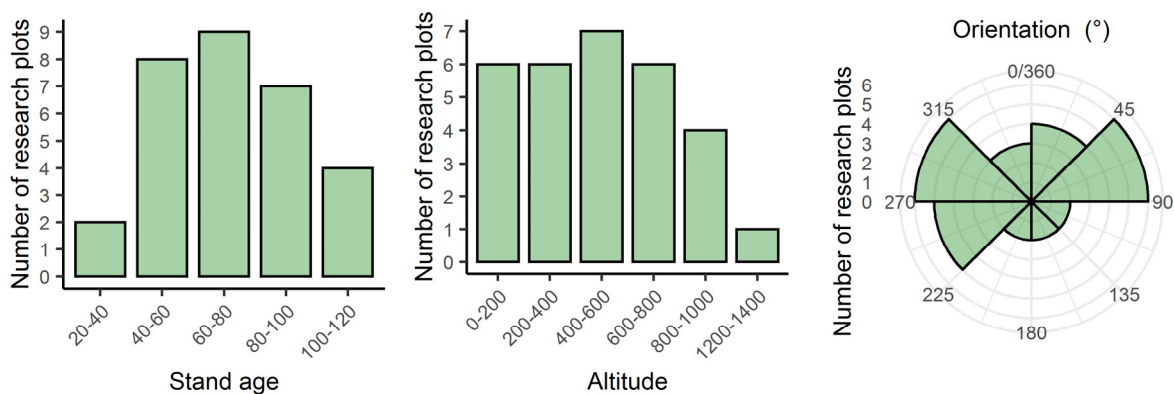

**Figure S2.** Distribution of 28 research plots by stand age, altitude and orientation

**Table S1.** Additional site factor variables and data sources

| Parameter          | Source                      |
|--------------------|-----------------------------|
| Altitude (m)       | Digital Elevation Model [2] |
| Latitude (WGS 84)  | ICP Forests database        |
| Longitude (WGS 84) | ICP Forests database        |
| Orientation (°)    | Field measurement           |
| Stand age          | ICP Forests database        |

**Table S2.** Descriptive statistics of soil chemical properties from 28 research plots and the applied methods of analysis.

|                                      | Minimum | Maximum | Mean | Standard deviation | Method                                        |
|--------------------------------------|---------|---------|------|--------------------|-----------------------------------------------|
| Total nitrogen (N <sub>total</sub> ) | 0,01    | 0,92    | 0,19 | 0,17               | Elementary analysis [3]                       |
| Available phosphorus (P)             | 0,12    | 15,32   | 1,72 | 2,19               | Spectrophotometry, molybdenum blue method [4] |
| Available potassium (K)              | 4,88    | 36,27   | 9,83 | 5,09               | AES Flame [5]                                 |
| pH                                   | 3,12    | 7,4     | 4,77 | 1,12               | Potentiometry [6]                             |

## References

1. Shumway, R.H.; Stoffer, D.S.; Stoffer, D.S. *Time series analysis and its applications*; Springer: 2000; Volume 3.
2. EEA. European Digital Elevation Model (EU-DEM), version 1.1, European Environment Agency (EEA), <https://land.copernicus.eu/imagery-in-situ/eu-dem/eu-dem-v1.1?tab=metadata>. **2016**.
3. ISO-13878. Soil quality - Determination of total nitrogen content by dry combustion ("elemental analysis"). **1998**.
4. Egnér, H.; Riehm, H.; Domingo, W.R. Untersuchungen über die chemische Bodenanalyse als Grundlage für die Beurteilung des Nährstoffzustandes der Böden. II. Chemische Extraktionsmethoden zur Phosphor- und Kaliumbestimmung. *Kungliga Lantbrukshögskolans Annaler* **1960**, 26, 199-215.
5. Škorić, A. *Priručnik za pedološka istraživanja*; Fakultet poljoprivrednih znanosti: Zagreb, 1985.
6. ISO-10390. Soil quality - Determination of pH. **2005**.
